# Supplementary material
Source: Springer Nature journal article supplement (https://www.springermedizin.de/resource/supplementary/12936_2013_3094_MOESM3_ESM.pdf/9545824)

## A. Azithromycin

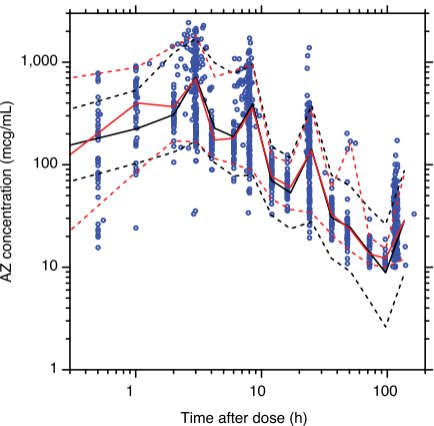

## B. Chloroquine

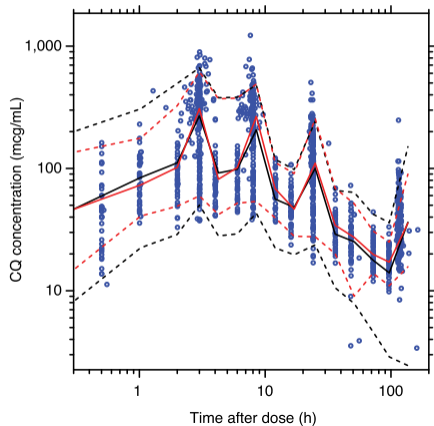

Supplement: MOESM3 [file 9545824]
